# Supplementary material for: Towards the use of an amino acid cleavable linker for solid-phase chemical synthesis of peptides and proteins
Source: Royal Society of Chemistry journal article supplement (doi:10.1039/d2ob02198f), 2022-12-23
Supplement: d2ob02198f1.pdf [file d2ob02198f1.pdf]

## Table of Contents

|                                                                                                             |    |
|-------------------------------------------------------------------------------------------------------------|----|
| 1. Experimental Section.....                                                                                | 2  |
| 1.1 SPPS MW cycle and method descriptions of CEM Liberty Blue™ Automated Microwave Peptide Synthesizer .... | 2  |
| 1.2 SPPS procedure for peptide 1.....                                                                       | 9  |
| 1.3 SPPS procedure for polypeptide H-LFKAGCFKAGCFKGAG-NH <sub>2</sub> for calibration curve.....            | 10 |
| 1.4 SPPS procedure for peptide 4a.....                                                                      | 11 |
| 1.5 SPPS procedure for peptide 4b.....                                                                      | 12 |
| 1.6 SPPS procedure for peptide 4c.....                                                                      | 13 |
| 1.7 SPPS procedure for peptide 5a.....                                                                      | 14 |
| 1.8 SPPS procedure for peptide 5b.....                                                                      | 15 |
| 1.9 SPPS procedure for peptide 5c.....                                                                      | 16 |
| 2. LC/MS chromatograms for the synthesis of compounds <b>4</b> .....                                        | 18 |
| 3. LC/MS chromatograms for the synthesis of compounds <b>5</b> .....                                        | 22 |
| 4. Supplementary figures .....                                                                              | 24 |
| 5. References .....                                                                                         | 25 |

## 1. Experimental Section

**General Methods.** Solid Phase Peptide Syntheses were performed on a CEM Liberty Blue™ Automated Microwave Peptide Synthesizer and in TELOS Filtration Columns equipped with 20 µm polyethylene frits. Reaction temperatures are stated as heating device temperature of the synthesizer, if not otherwise stated. Deionized water was obtained by an Elga PURELAB 8 Option system (15 MΩ·cm). Reagents obtained from commercial suppliers were used without further purification unless otherwise stated. Protected amino acids, Rink Amide MBHA resin, DIC, oxyma pure, piperazine, trifluoroacetic acid and triisopropylsilane (TIS) were purchased from Fluorochem. Fmoc-MeDbz-OH was purchased from Iris Biotech GmbH. DMF was purchased from Fisher Scientific. Fmoc-Asp(OtBu)-(Dmb)Gly-OH, Rink Amide ProTide (LL) and Cl-TCP(Cl) ProTide resins were purchased from CEM Corporation. For HPLC mobile phase, HPLC grade CH<sub>3</sub>CN from Fisher Scientific and trifluoroacetic acid from Fluorochem were used. For LC/MS mobile phase, LC/MS grade water and CH<sub>3</sub>CN from Fisher Scientific and formic acid from Fisher Scientific were used. Reagents were used without further purification unless otherwise noted. LC/MS was performed on an Agilent 1260 Infinity II HPLC system, equipped with an ACE 3 C18, 2.1 x 100 mm, particle size 3 µm, pore size 300 Å and connected to a 6120 Quadrupole MS. Preparative HPLC was performed on a LC20-AR Shimadzu HPLC system equipped with either a Vydac 208TP C8, 22 x 250 mm, particle size 10 µm, pore size 300 Å or a Shim-pack GIST C18, 20 x 150 mm, particle size 5 µm, pore size 100 Å and semi-preparative HPLC was performed on an Agilent 1206 Infinity HPLC system equipped with either a Zobrax-300SB C8, 4.6 x 150 mm, particle size 5 µm, pore size 300 Å or with an ACE C18, 10.0 x 250 mm, particle size 5 µm, pore size 100 Å. Determinations of PEGA, and ChemMatrix resins loading and ubiquitin derivative yield were conducted using a ThermoFisher NanoDrop ND-ONE-W spectrophotometer. Absorbance values were measured in 10 mm path-length cuvettes (Fisher Scientific, #11847832).

### 1.1 SPPS MW cycle and method descriptions of CEM Liberty Blue™ Automated Microwave Peptide Synthesizer

#### MW cycle 1

| Temperature (°C) | Power (W) | Hold time (s) |
|------------------|-----------|---------------|
| 25               | 0         | 300           |
| 50               | 35        | 600           |

#### MW cycle 2

| Temperature (°C) | Power (W) | Hold time (s) |
|------------------|-----------|---------------|
| 75               | 30        | 300           |

#### MW cycle 3

| Temperature (°C) | Power (W) | Hold time (s) |
|------------------|-----------|---------------|
| 25               | 0         | 5             |
| 80               | 115       | 20            |
| 86               | 70        | 10            |
| 90               | 30        | 120           |

#### MW cycle 4

| Temperature (°C) | Power (W) | Hold time (s) |
|------------------|-----------|---------------|
| 25               | 0         | 5             |
| 80               | 115       | 20            |
| 86               | 70        | 10            |
| 90               | 30        | 480           |

#### MW cycle 5

| <b>Temperature (°C)</b> | <b>Power (W)</b> | <b>Hold time (s)</b> |
|-------------------------|------------------|----------------------|
| 25                      | 0                | 120                  |
| 50                      | 35               | 600                  |

**MW cycle 6**

| <b>Temperature (°C)</b> | <b>Power (W)</b> | <b>Hold time (s)</b> |
|-------------------------|------------------|----------------------|
| 75                      | 30               | 420                  |

**MW cycle 7**

| <b>Temperature (°C)</b> | <b>Power (W)</b> | <b>Hold time (s)</b> |
|-------------------------|------------------|----------------------|
| 50                      | 30               | 30                   |

**MW cycle 8**

| <b>Temperature (°C)</b> | <b>Power (W)</b> | <b>Hold time (s)</b> |
|-------------------------|------------------|----------------------|
| 50                      | 30               | 180                  |

**MW cycle 9**

| <b>Temperature (°C)</b> | <b>Power (W)</b> | <b>Hold time (s)</b> |
|-------------------------|------------------|----------------------|
| 25                      | 0                | 300                  |

**MW cycle 10**

| <b>Temperature (°C)</b> | <b>Power (W)</b> | <b>Hold time (s)</b> |
|-------------------------|------------------|----------------------|
| 25                      | 0                | 600                  |

**MW cycle 11**

| <b>Temperature (°C)</b> | <b>Power (W)</b> | <b>Hold time (s)</b> |
|-------------------------|------------------|----------------------|
| 20                      | 0                | 5                    |
| 78                      | 100              | 20                   |
| 88                      | 60               | 10                   |

**MW cycle 12**

| <b>Temperature (°C)</b> | <b>Power (W)</b> | <b>Hold time (s)</b> |
|-------------------------|------------------|----------------------|
| 25                      | 0                | 5                    |
| 78                      | 80               | 20                   |
| 88                      | 50               | 10                   |
| 90                      | 25               | 60                   |

**MW cycle 13**

| <b>Temperature (°C)</b> | <b>Power (W)</b> | <b>Hold time (s)</b> |
|-------------------------|------------------|----------------------|
| 50                      | 60               | 270                  |

**Method 1**

| Step | Operation             | Parameters                                               | MW cycle |
|------|-----------------------|----------------------------------------------------------|----------|
| 1    | Wash                  | DMF volume: 4 mL                                         | --       |
| 2    | Deprotection (x2)     | Deprotection cocktail volume: 2 mL                       | 9+10     |
| 3    | Wash (x4)             | DMF volume: 4 mL                                         | --       |
| 4    | Coupling (x2)         | AA volume: 1.5 mL, DIC volume: 1 mL, HOBt volume: 0.5 mL | 5        |
| 5    | Wash through manifold | synthesiser<br>DMF volume: 4 mL                          | --       |

**Method 2**

| Step | Operation             | Parameters                                             | MW cycle |
|------|-----------------------|--------------------------------------------------------|----------|
| 1    | Wash                  | DMF volume: 4 mL                                       | --       |
| 2    | Deprotection (x2)     | Deprotection cocktail volume: 2 mL                     | 9+10     |
| 3    | Wash (x4)             | DMF volume: 4 mL                                       | --       |
| 4    | Coupling              | AA volume: 1.5 mL, DIC volume: 2 mL, HOBt volume: 1 mL | 5        |
| 5    | Wash through manifold | synthesiser<br>DMF volume: 4 mL                        | --       |

**Method 3**

| Step | Operation             | Parameters                                             | MW cycle |
|------|-----------------------|--------------------------------------------------------|----------|
| 1    | Wash                  | DMF volume: 4 mL                                       | --       |
| 2    | Deprotection (x2)     | Deprotection cocktail volume: 2 mL                     | 7+8      |
| 3    | Wash (x4)             | DMF volume: 4 mL                                       | --       |
| 4    | Coupling              | AA volume: 1.5 mL, DIC volume: 2 mL, HOBt volume: 1 mL | 5        |
| 5    | Wash through manifold | synthesiser<br>DMF volume: 4 mL                        | --       |

**Method 4**

| Step | Operation             | Parameters                                               | MW cycle |
|------|-----------------------|----------------------------------------------------------|----------|
| 1    | Wash                  | DMF volume: 4 mL                                         | --       |
| 2    | Deprotection (x2)     | Deprotection cocktail volume: 2 mL                       | 7+8      |
| 3    | Wash (x4)             | DMF volume: 4 mL                                         | --       |
| 4    | Coupling (x2)         | AA volume: 1.5 mL, DIC volume: 1 mL, HOBt volume: 0.5 mL | 5        |
| 5    | Wash through manifold | synthesiser<br>DMF volume: 4 mL                          | --       |

**Method 5**

| Step | Operation | Parameters | MW |
|------|-----------|------------|----|
|------|-----------|------------|----|

|   |                                   |                                                          | cycle |
|---|-----------------------------------|----------------------------------------------------------|-------|
| 1 | Wash                              | DMF volume: 4 mL                                         | --    |
| 2 | Coupling (x2)                     | AA volume: 1.5 mL, DIC volume: 1 mL, HOBt volume: 0.5 mL | 5     |
| 3 | Wash through synthesiser manifold | DMF volume: 4 mL                                         | --    |

#### Method 6

| Step | Operation                         | Parameters                                                     | MW cycle |
|------|-----------------------------------|----------------------------------------------------------------|----------|
| 1    | Deprotection                      | Deprotection cocktail volume: 2 mL                             | 12       |
| 3    | Wash (x4)                         | DMF volume: 4 mL                                               |          |
| 4    | Coupling                          | AA volume: 2.5 mL, DIC volume: 2 mL, Oxyma pure volume: 0.5 mL | 3        |
| 5    | Wash through synthesiser manifold | DMF volume: 4 mL                                               |          |

#### Method 7

| Step | Operation                         | Parameters                                                     | MW cycle |
|------|-----------------------------------|----------------------------------------------------------------|----------|
| 1    | Deprotection                      | Deprotection cocktail volume: 2 mL                             | 12       |
| 3    | Wash (x4)                         | DMF volume: 4 mL                                               |          |
| 4    | Coupling                          | AA volume: 2.5 mL, DIC volume: 2 mL, Oxyma pure volume: 0.5 mL | 1        |
| 5    | Wash through synthesiser manifold | DMF volume: 4 mL                                               |          |

#### Method 8

| Step | Operation                         | Parameters                                                     | MW cycle |
|------|-----------------------------------|----------------------------------------------------------------|----------|
| 1    | Wash                              | DMF volume: 4 mL                                               | --       |
| 2    | Deprotection (x2)                 | Deprotection cocktail volume: 2 mL                             | 9+10     |
| 3    | Wash (x4)                         | DMF volume: 4 mL                                               | --       |
| 4    | Coupling (x2)                     | AA volume: 0.75 mL, HATU volume: 0.5 mL, DIPEA volume: 0.25 mL | 6        |
| 5    | Wash through synthesiser manifold | DMF volume: 4 mL                                               | --       |

#### Method 9

| Step | Operation                         | Parameters                                                     | MW cycle |
|------|-----------------------------------|----------------------------------------------------------------|----------|
| 1    | Wash                              | DMF volume: 4 mL                                               | --       |
| 2    | Deprotection (x2)                 | Deprotection cocktail volume: 2 mL                             | 9+10     |
| 3    | Wash (x4)                         | DMF volume: 4 mL                                               | --       |
| 4    | Coupling (x3)                     | AA volume: 0.75 mL, HATU volume: 0.5 mL, DIPEA volume: 0.25 mL | 6        |
| 5    | Wash through synthesiser manifold | DMF volume: 4 mL                                               | --       |

---

manifold

---

#### Method 10

| Step | Operation             | Parameters                                                 | MW cycle |
|------|-----------------------|------------------------------------------------------------|----------|
| 1    | Wash                  | DMF volume: 4 mL                                           | --       |
| 2    | Deprotection (x2)     | Deprotection cocktail volume: 2 mL                         | 9+10     |
| 3    | Wash (x4)             | DMF volume: 4 mL                                           | --       |
| 4    | Coupling (x3)         | AA volume: 1.5 mL, HATU volume: 1 mL, DIPEA volume: 0.5 mL | 6        |
| 5    | Wash through manifold | synthesiser<br>DMF volume: 4 mL                            | --       |

#### Method 11

| Step | Operation             | Parameters                                                 | MW cycle |
|------|-----------------------|------------------------------------------------------------|----------|
| 1    | Wash                  | DMF volume: 4 mL                                           | --       |
| 2    | Deprotection (x2)     | Deprotection cocktail volume: 2 mL                         | 9+10     |
| 3    | Wash (x4)             | DMF volume: 4 mL                                           | --       |
| 4    | Coupling              | AA volume: 1.5 mL, HATU volume: 1 mL, DIPEA volume: 0.5 mL | 6        |
| 5    | Wash through manifold | synthesiser<br>DMF volume: 4 mL                            | --       |

#### Method 12

| Step | Operation             | Parameters                                                     | MW cycle |
|------|-----------------------|----------------------------------------------------------------|----------|
| 1    | Wash                  | DMF volume: 4 mL                                               | --       |
| 2    | Deprotection (x2)     | Deprotection cocktail volume: 2 mL                             | 11       |
| 3    | Wash (x4)             | DMF volume: 4 mL                                               | --       |
| 4    | Coupling (x2)         | AA volume: 0.75 mL, HATU volume: 0.5 mL, DIPEA volume: 0.25 mL | 6        |
| 5    | Wash through manifold | synthesiser<br>DMF volume: 4 mL                                | --       |

#### Method 13

| Step | Operation             | Parameters                                                 | MW cycle |
|------|-----------------------|------------------------------------------------------------|----------|
| 1    | Wash                  | DMF volume: 4 mL                                           | --       |
| 2    | Deprotection (x2)     | Deprotection cocktail volume: 2 mL                         | 11       |
| 3    | Wash (x4)             | DMF volume: 4 mL                                           | --       |
| 4    | Coupling              | AA volume: 1.5 mL, HATU volume: 1 mL, DIPEA volume: 0.5 mL | 6        |
| 5    | Wash through manifold | synthesiser<br>DMF volume: 4 mL                            | --       |

**Method 14**

| Step | Operation                         | Parameters                                                  | MW cycle |
|------|-----------------------------------|-------------------------------------------------------------|----------|
| 1    | Deprotection (x2)                 | Deprotection cocktail volume: 2 mL                          | 11       |
| 2    | Wash (x4)                         | DMF volume: 4 mL                                            | --       |
| 3    | Coupling                          | AA volume: 1 mL, HATU volume: 0.2 mL, DIPEA volume: 0.25 mL | 4        |
| 4    | Wash through synthesiser manifold | DMF volume: 4 mL                                            | --       |

**Method 15**

| Step | Operation                         | Parameters                                                                     | MW cycle |
|------|-----------------------------------|--------------------------------------------------------------------------------|----------|
| 1    | Deprotection (x2)                 | Deprotection cocktail volume: 2 mL                                             | 9+10     |
| 2    | Wash (x4)                         | DMF volume: 4 mL                                                               | --       |
| 3    | Coupling (x3)                     | AA volume: 1 mL, HATU volume: 0.15 mL, DIPEA volume: 0.25 mL, DMF volume: 2 mL | 6        |
| 4    | Wash through synthesiser manifold | DMF volume: 4 mL                                                               | --       |

**Method 16**

| Step | Operation                         | Parameters                                                     | MW cycle |
|------|-----------------------------------|----------------------------------------------------------------|----------|
| 1    | Wash                              | DMF volume: 4 mL                                               | --       |
| 2    | Deprotection (x2)                 | Deprotection cocktail volume: 2 mL                             | 7+8      |
| 3    | Wash (x4)                         | DMF volume: 4 mL                                               | --       |
| 4    | Coupling (x2)                     | AA volume: 0.75 mL, HATU volume: 0.5 mL, DIPEA volume: 0.25 mL | 5        |
| 5    | Wash through synthesiser manifold | DMF volume: 4 mL                                               | --       |

**Method 17**

| Step | Operation                         | Parameters                                                     | MW cycle |
|------|-----------------------------------|----------------------------------------------------------------|----------|
| 1    | Wash                              | DMF volume: 4 mL                                               | --       |
| 2    | Deprotection (x2)                 | Deprotection cocktail volume: 2 mL                             | 7+8      |
| 3    | Wash (x4)                         | DMF volume: 4 mL                                               | --       |
| 4    | Coupling                          | AA volume: 0.75 mL, HATU volume: 0.5 mL, DIPEA volume: 0.25 mL | 5        |
| 5    | Wash through synthesiser manifold | DMF volume: 4 mL                                               | --       |

**Method 18**

| Step | Operation | Parameters       | MW cycle |
|------|-----------|------------------|----------|
| 1    | Wash      | DMF volume: 4 mL | --       |

|   |                                   |                                                                |      |
|---|-----------------------------------|----------------------------------------------------------------|------|
| 2 | Deprotection (x2)                 | Deprotection cocktail volume: 2 mL                             | 9+10 |
| 3 | Wash (x4)                         | DMF volume: 4 mL                                               | --   |
| 4 | Coupling                          | AA volume: 0.75 mL, HATU volume: 0.5 mL, DIPEA volume: 0.25 mL | 5    |
| 5 | Wash through synthesiser manifold | DMF volume: 4 mL                                               | --   |

#### Method 19

| Step | Operation                         | Parameters                                                     | MW cycle |
|------|-----------------------------------|----------------------------------------------------------------|----------|
| 1    | Wash                              | DMF volume: 4 mL                                               | --       |
| 2    | Deprotection (x2)                 | Deprotection cocktail volume: 2 mL                             | 9+10     |
| 3    | Wash (x4)                         | DMF volume: 4 mL                                               | --       |
| 4    | Coupling (x2)                     | AA volume: 0.75 mL, HATU volume: 0.5 mL, DIPEA volume: 0.25 mL | 5        |
| 5    | Wash through synthesiser manifold | DMF volume: 4 mL                                               | --       |

#### Method 20

| Step | Operation                         | Parameters                                                     | MW cycle |
|------|-----------------------------------|----------------------------------------------------------------|----------|
| 1    | Wash                              | DMF volume: 4 mL                                               | --       |
| 2    | Deprotection (x2)                 | Deprotection cocktail volume: 2 mL                             | 12       |
| 3    | Wash (x4)                         | DMF volume: 4 mL                                               | --       |
| 4    | Coupling (x2)                     | AA volume: 0.75 mL, HATU volume: 0.5 mL, DIPEA volume: 0.25 mL | 5        |
| 5    | Wash through synthesiser manifold | DMF volume: 4 mL                                               | --       |

#### Method 21

| Step | Operation                         | Parameters                                                     | MW cycle |
|------|-----------------------------------|----------------------------------------------------------------|----------|
| 1    | Wash                              | DMF volume: 4 mL                                               | --       |
| 2    | Deprotection (x2)                 | Deprotection cocktail volume: 2 mL                             | 11       |
| 3    | Wash (x4)                         | DMF volume: 4 mL                                               | --       |
| 4    | Coupling                          | AA volume: 0.75 mL, HATU volume: 0.5 mL, DIPEA volume: 0.25 mL | 5        |
| 5    | Wash through synthesiser manifold | DMF volume: 4 mL                                               | --       |

#### Method 22

| Step | Operation         | Parameters                                   | MW cycle |
|------|-------------------|----------------------------------------------|----------|
| 1    | Wash              | DMF volume: 4 mL                             | --       |
| 2    | Deprotection (x2) | Deprotection cocktail volume: 2 mL           | 11       |
| 3    | Wash (x4)         | DMF volume: 4 mL                             | --       |
| 4    | Coupling (x2)     | AA volume: 0.75 mL, DIC volume: 0.5 mL, HOBt | 3        |



|   |                       |             |                  |    |
|---|-----------------------|-------------|------------------|----|
|   |                       |             | volume: 0.25 mL  |    |
| 5 | Wash through manifold | synthesiser | DMF volume: 4 mL | -- |

### Method 23

| Step | Operation             |             | Parameters                                               | MW cycle |
|------|-----------------------|-------------|----------------------------------------------------------|----------|
| 1    | Wash                  |             | DMF volume: 4 mL                                         | --       |
| 2    | Deprotection (x2)     |             | Deprotection cocktail volume: 2 mL                       | 7+8      |
| 3    | Wash (x4)             |             | DMF volume: 4 mL                                         | --       |
| 4    | Coupling              |             | AA volume: 1.5 mL, DIC volume: 1 mL, HOBT volume: 0.5 mL | 3        |
| 5    | Wash through manifold | synthesiser | DMF volume: 4 mL                                         | --       |

### Method 24

| Step | Operation             |             | Parameters                                                   | MW cycle |
|------|-----------------------|-------------|--------------------------------------------------------------|----------|
| 1    | Wash                  |             | DMF volume: 4 mL                                             | --       |
| 2    | Deprotection (x2)     |             | Deprotection cocktail volume: 2 mL                           | 7+8      |
| 3    | Wash (x4)             |             | DMF volume: 4 mL                                             | --       |
| 4    | Coupling (x2)         |             | AA volume: 0.75 mL, DIC volume: 0.5 mL, HOBT volume: 0.25 mL | 3        |
| 5    | Wash through manifold | synthesiser | DMF volume: 4 mL                                             | --       |

### 1.2 SPPS procedure for peptide 1

Synthesis scale: 0.1 mmol. Resin: Cl-TCP(Cl) ProTide, loading 0.4 mmol/g – 250 mg. DIC concentration in DMF: 1 M. HOBT concentration in DMF: 1 M. Deprotection cocktail: 20% (v/v) piperidine in DMF + 1% (v/v) formic acid. Fmoc-amino acids in DMF: 0.33 M. Prior to the start of the automated synthesis, the resin is swollen in DMF for 5 min at rt and functionalized with hydrazine hydrate following the previously reported procedure.<sup>1</sup>

| Reagent          | Method | Reagent concentration during coupling step (mM) |
|------------------|--------|-------------------------------------------------|
| Fmoc-Ala-OH      | 5      | 167                                             |
| Fmoc-Gly-OH      | 4      | 167                                             |
| Fmoc-Trp(Boc)-OH | 4      | 167                                             |
| Fmoc-His(Trt)-OH | 3      | 220                                             |
| Fmoc-His(Trt)-OH | 2      | 220                                             |
| Fmoc-Ser(tBu)-OH | 1      | 167                                             |
| Fmoc-Gly-OH      | 1      | 167                                             |
| Fmoc-Ala-OH      | 1      | 167                                             |
| Fmoc-Gly-OH      | 1      | 167                                             |
| Fmoc-Lys(Boc)-OH | 1      | 167                                             |
| Fmoc-Phe-OH      | 1      | 167                                             |
| Fmoc-Leu-OH      | 1      | 167                                             |
| Fmoc-Ala-OH      | 1      | 167                                             |

The last coupling is followed by a deprotection step, performed using 4 mL of deprotection cocktail with MW cycle 14. Cleavage was done with 10 mL of TFA/water/TIS (95:2.5:2.5) for 2 h. The resin was removed by filtration and the filtrate was concentrated by N<sub>2</sub> flow. The crude product was precipitated with cold diethyl ether, centrifuged (4,000 g for 10 min) and the supernatant was discarded. The precipitate was dissolved in water + 0.1% TFA and purified by HPLC. Product was characterized at the LC/MS.

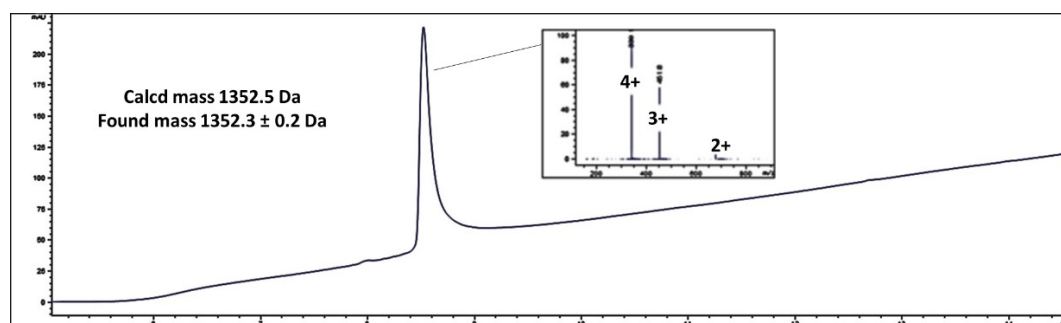

LC chromatogram recorded at 214 nm (+ mass spectrum of the indicated peak) of peptide **1**. Column: *ACE 3 C18*, 2.1 x 100 mm, 3 μm particle size, 300 Å pore size; Method: flow rate = 0.5 mL · min<sup>-1</sup>, H<sub>2</sub>O: CH<sub>3</sub>CN, 0.1% HCOOH, 95:5 for 2 min → 95:5 to 43:57 over 13 min → 5:95 for 7 min.

### 1.3 SPPS procedure for polypeptide H-LFKAGCFKAGCFKGAG-NH<sub>2</sub> for calibration curve

Synthesis scale: 0.1 mmol. Resin: Rink Amide MBHA, loading 0.49 mmol/g – 204 mg. DIC concentration in DMF: 0.5 M. Oxyma pure concentration in DMF: 1 M. Deprotection cocktail: 20% (v/v) piperidine in DMF. Fmoc-amino acids in DMF: 0.2 M. Prior to the start of the synthesis, the resin is swollen in the reaction vessel of the automated synthesizer using 5 mL of DMF for 5 min at rt.

| Reagent          | Method | Reagent concentration during coupling step (mM) |
|------------------|--------|-------------------------------------------------|
| Fmoc-Gly-OH      | 6      | 100                                             |
| Fmoc-Ala-OH      | 6      | 100                                             |
| Fmoc-Gly-OH      | 6      | 100                                             |
| Fmoc-Lys(Boc)-OH | 6      | 100                                             |
| Fmoc-Phe-OH      | 6      | 100                                             |
| Fmoc-Cys(Trt)-OH | 7      | 100                                             |
| Fmoc-Gly-OH      | 6      | 100                                             |
| Fmoc-Ala-OH      | 6      | 100                                             |
| Fmoc-Lys(Boc)-OH | 6      | 100                                             |
| Fmoc-Phe-OH      | 6      | 100                                             |
| Fmoc-Cys(Trt)-OH | 7      | 100                                             |
| Fmoc-Gly-OH      | 6      | 100                                             |
| Fmoc-Ala-OH      | 6      | 100                                             |
| Fmoc-Lys(Boc)-OH | 6      | 100                                             |
| Fmoc-Phe-OH      | 6      | 100                                             |
| Fmoc-Leu-OH      | 6      | 100                                             |

The last coupling is followed by a deprotection step, performed using 4 mL of deprotection cocktail with MW cycle 14. Cleavage was done with 10 mL of TFA/water/TIS/DODT (92.2:2.5:5:2.5:2.5) for 2 h. The resin was removed by filtration and the filtrate was concentrated by N<sub>2</sub> flow. The crude product was precipitated with cold diethyl ether, centrifuged (4,000 g for 10 min) and the supernatant was discarded. The precipitate was dissolved in water + 0.1% TFA and purified by HPLC. Product was characterized at the LC/MS. See Supplementary Figure 3 for calibration curve.

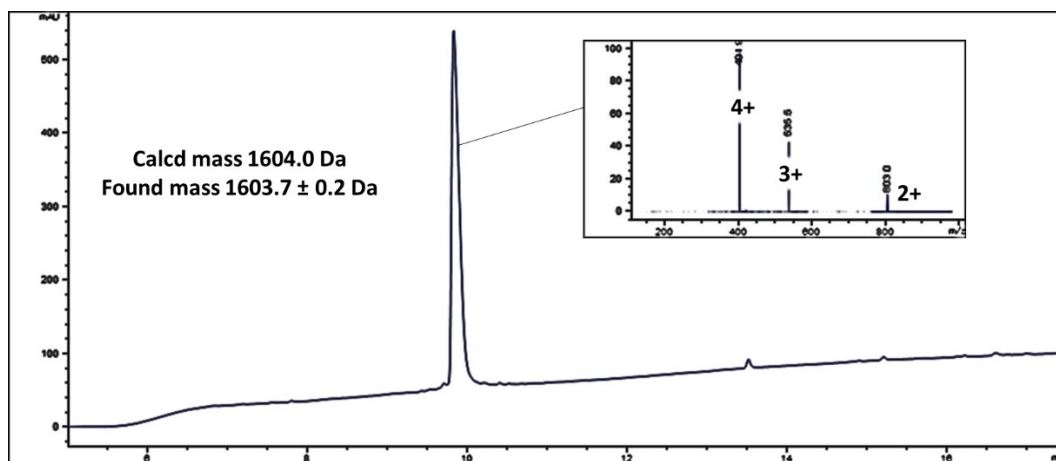

LC chromatogram recorded at 214 nm (+ mass spectrum of the indicated peak) of polypeptide **H-LFKAGCFKAGCFKGAG-NH<sub>2</sub>**. Column: ACE 3 C18, 2.1 x 100 mm, 3 μm particle size, 300 Å pore size; Method: flow rate = 0.5 mL · min<sup>-1</sup>, H<sub>2</sub>O: CH<sub>3</sub>CN, 0.1% HCOOH, 95:5 for 2 min → 95:5 to 43:57 over 13 min → 5:95 for 7 min.

#### 1.4 SPPS procedure for peptide 4a

Synthesis scale: 0.1 mmol. Resin: Cl-TCP(Cl) ProTide, loading 0.4 mmol/g – 250 mg. DIC concentration in DMF: 1 M. HOBT concentration in DMF: 1 M. Deprotection cocktail: 20% (v/v) piperidine in DMF + 1% (v/v) formic acid. Fmoc-amino acids in DMF: 0.33 M. Prior to the start of the automated synthesis, the resin is swollen in DMF for 5 min at rt and functionalized with hydrazine hydrate following the previously reported procedure.<sup>1</sup>

| Reagent          | Method | Reagent concentration during coupling step (mM) |
|------------------|--------|-------------------------------------------------|
| Fmoc-Ala-OH      | 5      | 167                                             |
| Fmoc-Gly-OH      | 4      | 167                                             |
| Fmoc-Trp(Boc)-OH | 4      | 167                                             |
| Fmoc-His(Trt)-OH | 3      | 220                                             |
| Fmoc-His(Trt)-OH | 2      | 220                                             |
| Fmoc-Ser(tBu)-OH | 1      | 167                                             |
| Fmoc-Gly-OH      | 1      | 167                                             |
| Fmoc-Ala-OH      | 1      | 167                                             |
| Fmoc-Gly-OH      | 1      | 167                                             |
| Fmoc-Lys(Boc)-OH | 1      | 167                                             |
| Fmoc-Phe-OH      | 1      | 167                                             |
| Fmoc-Leu-OH      | 1      | 167                                             |
| Fmoc-Thz-OH      | 1      | 167                                             |

The last coupling is followed by a deprotection step, performed using 4 mL of deprotection cocktail with MW cycle 14. Cleavage was done with 10 mL of TFA/water/TIS (95:2.5:2.5) for 2 h. The resin was removed by filtration and the filtrate was concentrated by N<sub>2</sub> flow. The crude product was precipitated with cold diethyl ether, centrifuged (4,000 g for 10 min) and the supernatant was discarded. The precipitate was dissolved in 0.2 M phosphate buffer, containing 6 M GdmCl and the crude product was converted into the corresponding MPAA thioester as previously described.<sup>2</sup> The desired product was then isolated by HPLC. Product was characterized at the LC/MS.

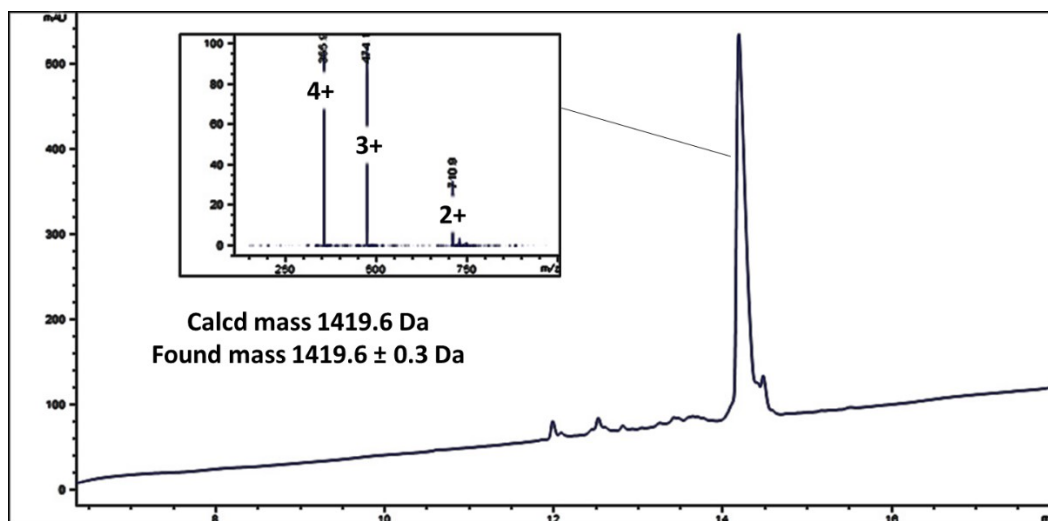

LC chromatogram recorded at 214 nm (+ mass spectrum of the indicated peak) of peptide **4a**. Column: *ACE 3 C18*, 2.1 x 100 mm, 3  $\mu\text{m}$  particle size, 300  $\text{\AA}$  pore size; Method: flow rate = 0.5 mL  $\cdot$  min $^{-1}$ , H $_2$ O: CH $_3$ CN, 0.1% HCOOH, 95:5 for 2 min  $\rightarrow$  95:5 to 43:57 over 13 min  $\rightarrow$  5:95 for 7 min.

### 1.5 SPPS procedure for peptide 4b

Synthesis scale: 0.1 mmol. Resin: Cl-TCP(Cl) ProTide, loading 0.4 mmol/g – 250 mg. DIC concentration in DMF: 1 M. HOBT concentration in DMF: 1 M. Deprotection cocktail: 20% (v/v) piperidine in DMF + 1% (v/v) formic acid. Fmoc-amino acids in DMF: 0.33 M. Prior to the start of the automated synthesis, the resin is swollen in DMF for 5 min at rt and functionalized with hydrazine hydrate following the previously reported procedure.<sup>1</sup>

| Reagent          | Method | Reagent concentration during coupling step (mM) |
|------------------|--------|-------------------------------------------------|
| Fmoc-Gly-OH      | 6      | 100                                             |
| Fmoc-Ala-OH      | 6      | 100                                             |
| Fmoc-Lys(Boc)-OH | 6      | 100                                             |
| Fmoc-Phe-OH      | 6      | 100                                             |
| Fmoc-Thz-OH      | 7      | 100                                             |

The last coupling is followed by a deprotection step, performed using 4 mL of deprotection cocktail with MW cycle 14. Cleavage was done with 10 mL of TFA/water/TIS (95:2.5:2.5) for 2 h. The resin was removed by filtration and the filtrate was concentrated by N $_2$  flow. The crude product was precipitated with cold diethyl ether, centrifuged (4,000 g for 10 min) and the supernatant was discarded. The precipitate was dissolved in 0.2 M phosphate buffer, containing 6 M GdmCl and the crude product was converted into the corresponding thiophenol thioester as previously described.<sup>2</sup> The desired product was then isolated by HPLC. Product was characterized at the LC/MS.

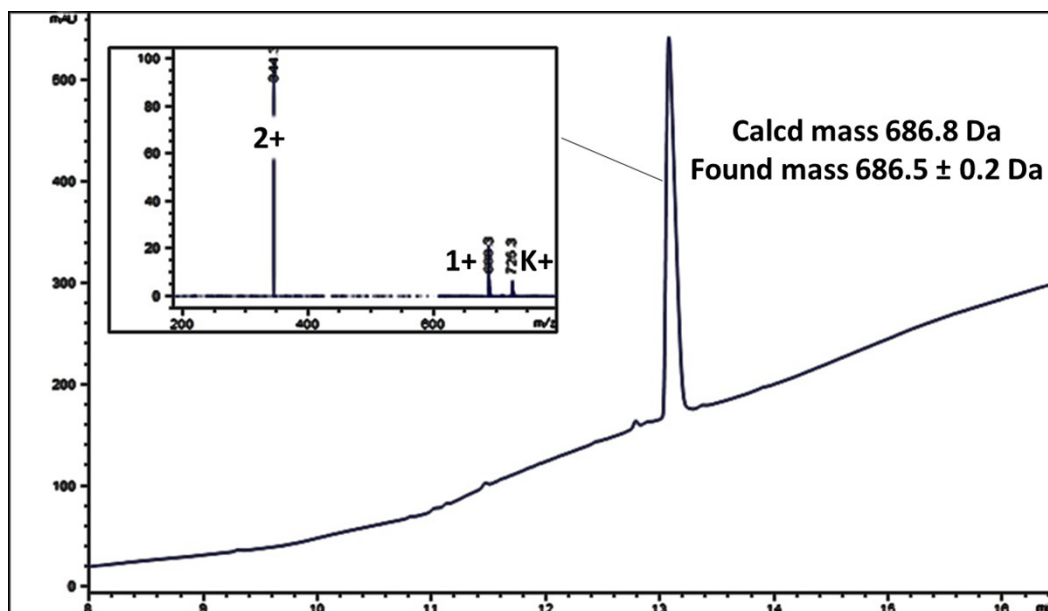

LC chromatogram recorded at 214 nm (+ mass spectrum of the indicated peak) of peptide **4b**. Column: *ACE 3 C18*, 2.1 x 100 mm, 3  $\mu$ m particle size, 300  $\text{\AA}$  pore size; Method: flow rate = 0.5 mL  $\cdot$  min $^{-1}$ , H $_2$ O: CH $_3$ CN, 0.1% HCOOH, 95:5 for 2 min  $\rightarrow$  95:5 to 43:57 over 13 min  $\rightarrow$  5:95 for 7 min.

#### 1.6 SPPS procedure for peptide 4c

Synthesis scale: 0.1 mmol. Resin: Cl-TCP(Cl) ProTide, loading 0.4 mmol/g – 250 mg. DIC concentration in DMF: 1 M. HOBT concentration in DMF: 1 M. Deprotection cocktail: 20% (v/v) piperidine in DMF + 1% (v/v) formic acid. Fmoc-amino acids in DMF: 0.33 M. Prior to the start of the automated synthesis, the resin is swollen in DMF for 5 min at rt and functionalized with hydrazine hydrate following the previously reported procedure.<sup>1</sup>

| Reagent          | Method | Reagent concentration during coupling step (mM) |
|------------------|--------|-------------------------------------------------|
| Fmoc-Gly-OH      | 6      | 100                                             |
| Fmoc-Ala-OH      | 6      | 100                                             |
| Fmoc-Lys(Boc)-OH | 6      | 100                                             |
| Fmoc-Phe-OH      | 6      | 100                                             |
| Fmoc-Leu-OH      | 6      | 100                                             |

The last coupling is followed by a deprotection step, performed using 4 mL of deprotection cocktail with MW cycle 14. Cleavage was done with 10 mL of TFA/water/TIS (95:2.5:2.5) for 2 h. The resin was removed by filtration and the filtrate was concentrated by N $_2$  flow. The crude product was precipitated with cold diethyl ether, centrifuged (4,000 g for 10 min) and the supernatant was discarded. The precipitate was dissolved in 0.2 M phosphate buffer, containing 6 M GdmCl and the crude product was converted into the corresponding tiphenol thioester as previously described.<sup>1</sup> The desired product was then isolated by HPLC. Product was characterized at the LC/MS.

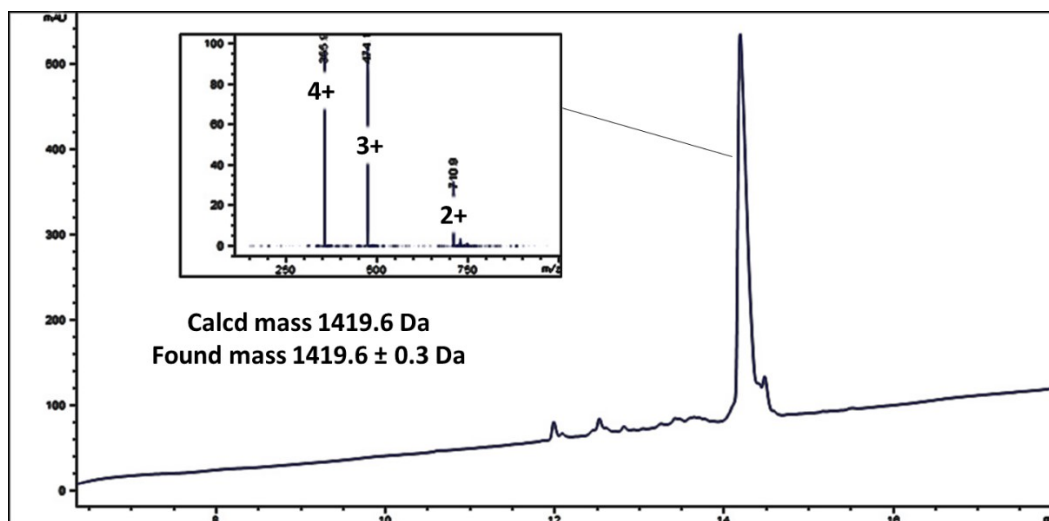

LC chromatogram recorded at 214 nm (+ mass spectrum of the indicated peak) of peptide **4c**. Column: *ACE 3 C18*, 2.1 x 100 mm, 3  $\mu$ m particle size, 300 Å pore size; Method: flow rate = 0.5 mL · min<sup>-1</sup>, H<sub>2</sub>O: CH<sub>3</sub>CN, 0.1% HCOOH, 95:5 for 2 min → 95:5 to 43:57 over 13 min → 5:95 for 7 min.

### 1.7 SPPS procedure for peptide 5a

Synthesis scale: 0.05 mmol. Resin: Rink Amide ProTide Resin (LL), loading 0.19 mmol/g – 263 mg. HATU concentration in DMF: 0.5 M. DIPEA concentration in NMP: 2 M. Deprotection cocktail: 20% (v/v) piperidine in DMF + 1% (v/v) formic acid. Fmoc-MeDbz-OH in DMF: 0.05 M. Fmoc-Asp(OtBu)-(Dmb)Gly-OH in DMF: 0.15 M. Amino acids in DMF: 0.33 M. Prior to the start of the synthesis, the resin is swollen in the reaction vessel of the automated synthesizer using 5 mL of DMF for 5 min at rt.

| Reagent           | Method | Reagent concentration during coupling step (mM) |
|-------------------|--------|-------------------------------------------------|
| Fmoc-Gly-OH       | 20     | 167                                             |
| Fmoc-MeDbz-OH     | 14     | 35                                              |
| Fmoc-Ala-OH       | 20     | 167                                             |
| Fmoc-Gly-OH       | 21     | 167                                             |
| Fmoc-Trp(Boc)-OH  | 20     | 167                                             |
| Fmoc-His(Trt)-OH  | 20     | 167                                             |
| Fmoc-His(Trt)-OH  | 19     | 167                                             |
| Fmoc-Ser(tBu)-OH  | 18     | 167                                             |
| Fmoc-Gly-OH       | 17     | 167                                             |
| Fmoc-Gly-OH       | 17     | 167                                             |
| Fmoc-Arg(Pbf)-OH  | 16     | 167                                             |
| Fmoc-Leu-OH       | 16     | 167                                             |
| Fmoc-Arg(Pbf)-OH  | 16     | 167                                             |
| Fmoc-Leu-OH       | 16     | 167                                             |
| Fmoc-Val-OH       | 16     | 167                                             |
| Fmoc-Leu-OH       | 16     | 167                                             |
| Fmoc-His(Trt)-OH  | 16     | 167                                             |
| Fmoc-Leu-OH       | 16     | 167                                             |
| Fmoc-Thr(tBu)-OH  | 8      | 167                                             |
| Fmoc-Ser(tBu)-OH  | 8      | 167                                             |
| Fmoc-Glu(OtBu)-OH | 8      | 167                                             |
| Fmoc-Lys(Boc)-OH  | 8      | 167                                             |
| Fmoc-Gln(Trt)-OH  | 8      | 167                                             |
| Fmoc-Ile-OH       | 8      | 167                                             |

|                            |    |     |
|----------------------------|----|-----|
| Fmoc-Asn(Trt)-OH           | 8  | 167 |
| Fmoc-Tyr(tBu)-OH           | 8  | 167 |
| Fmoc-Asp(OtBu)-OH          | 8  | 167 |
| Fmoc-Ser(tBu)-OH           | 8  | 167 |
| Fmoc-Leu-OH                | 8  | 167 |
| Fmoc-Thr(tBu)-OH           | 8  | 167 |
| Fmoc-Arg(Pbf)-OH           | 8  | 167 |
| Fmoc-Asp(OtBu)-(Dmb)Gly-OH | 15 | 107 |
| Fmoc-Glu(OtBu)-OH          | 8  | 167 |
| Fmoc-Leu-OH                | 8  | 167 |
| Fmoc-Gln(Trt)-OH           | 8  | 167 |
| Fmoc-Lys(Boc)-OH           | 8  | 167 |
| Fmoc-Gly-OH                | 8  | 167 |
| Boc-Thz-OH                 | 8  | 167 |

After the last coupling, the MeDbz group is activated into MeNbz by incubating the resin with 5 equivalents of 4-nitrophenyl chloroformate in DCM (3 x 30 min), followed by 0.5 M DIPEA in DMF (3 x 10 min). Cleavage was done with 10 mL of TFA/water/TIS (95:2.5:2.5) for 2 h. The resin was removed by filtration and the filtrate was concentrated by N<sub>2</sub> flow. The crude product was precipitated with cold diethyl ether, centrifuged (4,000 g for 10 min) and the supernatant was discarded. The precipitate was dissolved in water/acetonitrile (1:1) + 0.1% TFA and purified by HPLC. Product was characterized at the LC/MS.

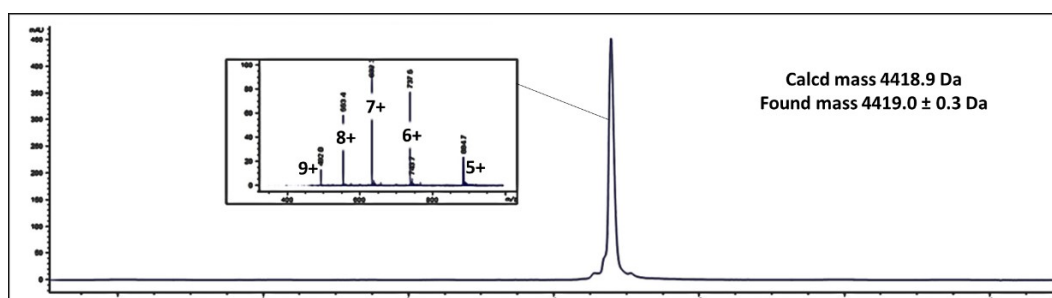

LC chromatogram recorded at 214 nm (+ mass spectrum of the indicated peak) of peptide **5a**. Column: *ACE 3 C18*, 2.1 x 100 mm, 3 μm particle size, 300 Å pore size; Method: flow rate = 0.5 mL · min<sup>-1</sup>, H<sub>2</sub>O: CH<sub>3</sub>CN, 0.1% HCOOH, 95:5 for 2 min → 95:5 to 55:45 over 10 min → 5:95 for 5 min.

### 1.8 SPPS procedure for peptide **5b**

Synthesis scale: 0.05 mmol. Resin: Rink Amide ProTide Resin (LL), loading 0.19 mmol/g – 263 mg. DIC concentration in DMF: 1 M. HOBt concentration in DMF: 1 M. Deprotection cocktail: 20% (v/v) piperidine in DMF + 1% (v/v) formic acid. Fmoc-MeDbz-OH in DMF: 0.05 M. Amino acids in DMF: 0.33 M. Prior to the start of the synthesis, the resin is swollen in the reaction vessel of the automated synthesizer using 5 mL of DMF for 5 min at rt.

| Reagent          | Method | Reagent concentration during coupling step (mM) |
|------------------|--------|-------------------------------------------------|
| Fmoc-Gly-OH      | 22     | 167                                             |
| Fmoc-MeDbz-OH    | 22     | 35                                              |
| Fmoc-Phe-OH      | 22     | 167                                             |
| Fmoc-Ile-OH      | 22     | 167                                             |
| Fmoc-Leu-OH      | 22     | 167                                             |
| Fmoc-Arg(Pbf)-OH | 22     | 167                                             |
| Fmoc-Gln(Trt)-OH | 22     | 167                                             |
| Fmoc-Gln(Trt)-OH | 22     | 167                                             |

|                   |    |     |
|-------------------|----|-----|
| Fmoc-Asp(OtBu)-OH | 22 | 167 |
| Fmoc-Pro-OH       | 23 | 167 |
| Fmoc-Pro-OH       | 23 | 167 |
| Fmoc-Ile-OH       | 24 | 167 |
| Fmoc-Gly-OH       | 24 | 167 |
| Fmoc-Glu(OtBu)-OH | 24 | 167 |
| Fmoc-Lys(Boc)-OH  | 24 | 167 |
| Fmoc-Asp(OtBu)-OH | 24 | 167 |
| Fmoc-Gln(Trt)-OH  | 24 | 167 |
| Fmoc-Ile-OH       | 24 | 167 |
| Fmoc-Lys(Boc)-OH  | 24 | 167 |
| Boc-Thz-OH        | 24 | 167 |

After the last coupling, the MeDbz group is activated into MeNbz by incubating the resin with 5 equivalents of 4-nitrophenyl chloroformate in DCM (3 x 30 min), followed by 0.5 M DIPEA in DMF (3 x 10 min). Cleavage was done with 10 mL of TFA/water/TIS (95:2.5:2.5) for 2 h. The resin was removed by filtration and the filtrate was concentrated by N<sub>2</sub> flow. The crude product was precipitated with cold diethyl ether, centrifuged (4,000 g for 10 min) and the supernatant was discarded. The precipitate was dissolved in water/acetonitrile (1:1) + 0.1% TFA and purified by HPLC. Product was characterized at the LC/MS.

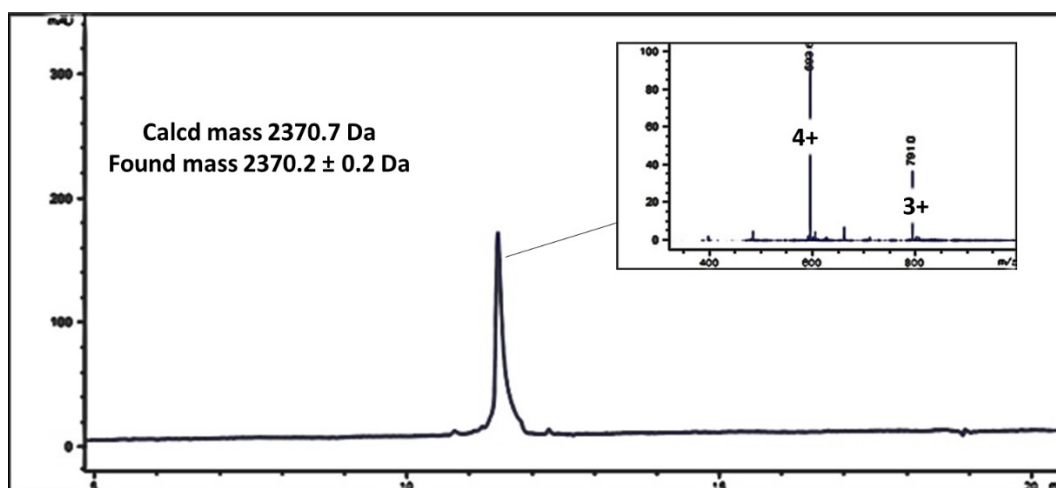

LC chromatogram recorded at 214 nm (+ mass spectrum of the indicated peak) of peptide **5b**. Column: *ACE 3 C18*, 2.1 x 100 mm, 3 μm particle size, 300 Å pore size; Method: flow rate = 0.5 mL · min<sup>-1</sup>, H<sub>2</sub>O: CH<sub>3</sub>CN, 0.1% HCOOH, 95:5 for 2 min → 95:5 to 43:57 over 13 min → 5:95 for 7 min.

### 1.9 SPPS procedure for peptide 5c

Synthesis scale: 0.05 mmol. Resin: Rink Amide ProTide Resin (LL), loading 0.19 mmol/g – 263 mg. HATU concentration in DMF: 0.5 M. DIPEA concentration in NMP: 2 M. Deprotection cocktail: 20% (v/v) piperidine in DMF + 1% (v/v) formic acid. Fmoc-MeDbz-OH in DMF: 0.05 M. Fmoc-amino acids in DMF: 0.33 M. Prior to the start of the synthesis, the resin is swollen in the reaction vessel of the automated synthesizer using 5 mL of DMF for 5 min at rt.

| Reagent           | Method | Reagent concentration during coupling step (mM) |
|-------------------|--------|-------------------------------------------------|
| Fmoc-Gly-OH       | 12     | 167                                             |
| Fmoc-MeDbz-OH     | 14     | 35                                              |
| Fmoc-Lys(Boc)-OH  | 12     | 167                                             |
| Fmoc-Val-OH       | 12     | 167                                             |
| Fmoc-Asn(Trt)-OH  | 12     | 167                                             |
| Fmoc-Glu(OtBu)-OH | 12     | 167                                             |



|                   |    |     |
|-------------------|----|-----|
| Fmoc-Ile-OH       | 12 | 167 |
| Fmoc-Thr(tBu)-OH  | 13 | 167 |
| Fmoc-Asp(OtBu)-OH | 12 | 167 |
| Fmoc-Ser(tBu)-OH  | 8  | 167 |
| Fmoc-Pro-OH       | 11 | 167 |
| Fmoc-Glu(OtBu)-OH | 8  | 167 |
| Fmoc-Val-OH       | 8  | 167 |
| Fmoc-Glu(OtBu)-OH | 8  | 167 |
| Fmoc-Leu-OH       | 8  | 167 |
| Fmoc-Thr(tBu)-OH  | 10 | 167 |
| Fmoc-Ile-OH       | 9  | 167 |
| Fmoc-Thr(tBu)-OH  | 10 | 167 |
| Fmoc-Lys(Boc)-OH  | 8  | 167 |
| Fmoc-Gly-OH       | 8  | 167 |
| Fmoc-Thr(tBu)-OH  | 10 | 167 |
| Fmoc-Leu-OH       | 8  | 167 |
| Fmoc-Thr(tBu)-OH  | 10 | 167 |
| Fmoc-Lys(Boc)-OH  | 8  | 167 |
| Fmoc-Val-OH       | 9  | 167 |
| Fmoc-Phe-OH       | 8  | 167 |
| Fmoc-Ile-OH       | 9  | 167 |
| Fmoc-Gln(Trt)-OH  | 8  | 167 |
| Boc-NLe-OH        | 8  | 167 |

After the last coupling, the MeDbz group is activated into MeNbz by incubating the resin with 5 equivalents of 4-nitrophenyl chloroformate in DCM (3 x 30 min), followed by 0.5 M DIPEA in DMF (3 x 10 min). Cleavage was done with 10 mL of TFA/water/TIS (95:2.5:2.5) for 2 h. The resin was removed by filtration and the filtrate was concentrated by N<sub>2</sub> flow. The crude product was precipitated with cold diethyl ether, centrifuged (4,000 g for 10 min) and the supernatant was discarded. The precipitate was dissolved in water/acetonitrile (1:1) + 0.1% TFA and purified by HPLC. Product was characterized at the LC/MS.

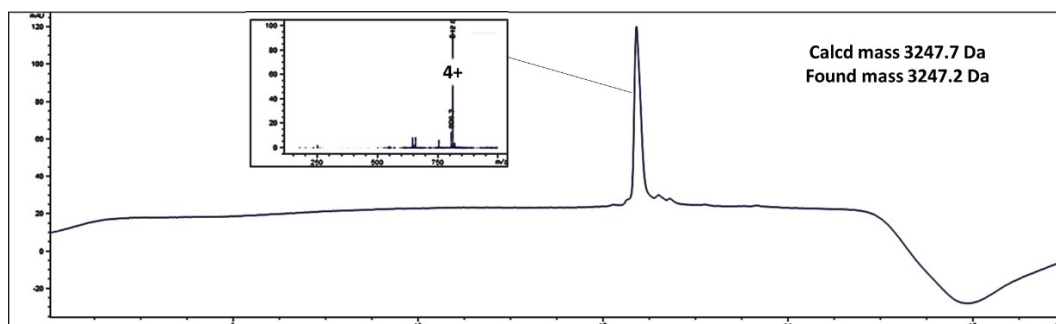

LC chromatogram recorded at 214 nm (+ mass spectrum of the indicated peak) of peptide **5c**. Column: ACE 3 C18, 2.1 x 100 mm, 3 μm particle size, 300 Å pore size; Method: flow rate = 0.5 mL · min<sup>-1</sup>, H<sub>2</sub>O: CH<sub>3</sub>CN, 0.1% HCOOH, 95:5 for 2 min → 95:5 to 55:45 over 10 min → 5:95 for 5 min.

## 2. LC/MS chromatograms for the synthesis of compounds 4

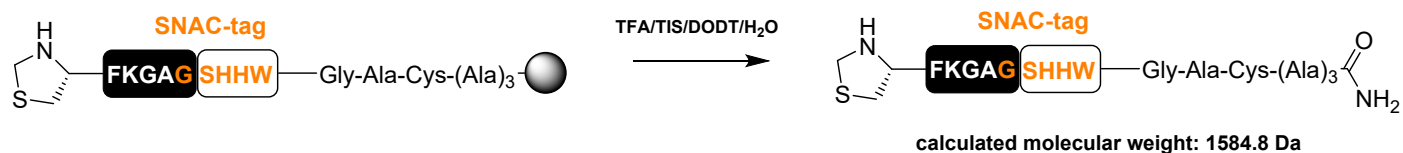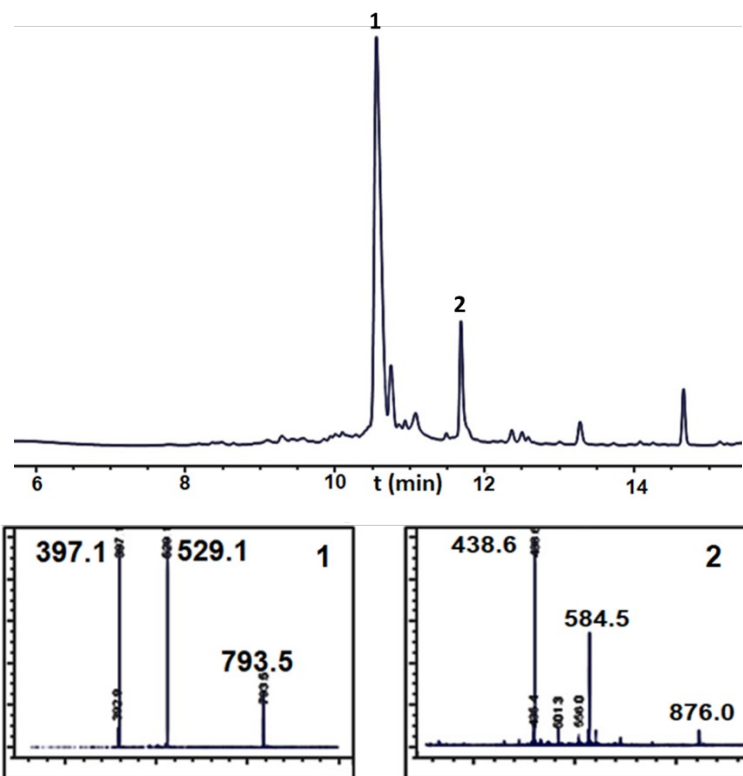

| peak # | found mass   | peak assignment |
|--------|--------------|-----------------|
| 1      | 1584.6 ± 0.3 |                 |
| 2      | 1750.3 ± 0.2 | ?               |

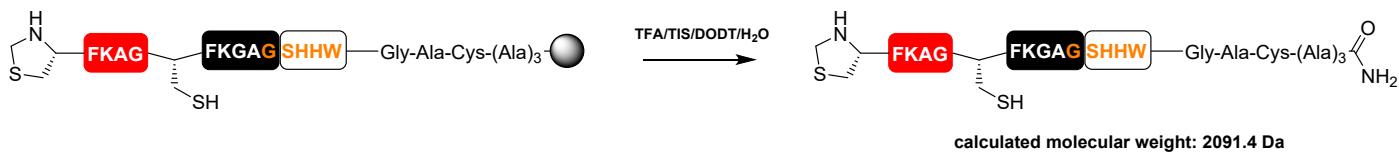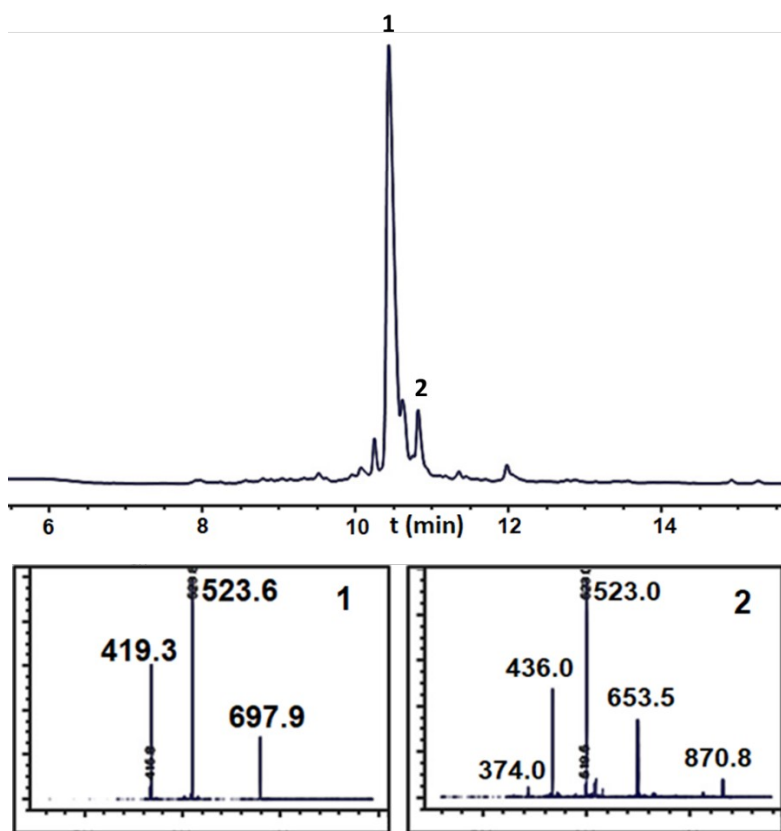

| peak # | found mass   | peak assignment |
|--------|--------------|-----------------|
| 1      | 2090.9 ± 0.4 |                 |
| 2      | 2610.1 ± 0.4 | ?               |

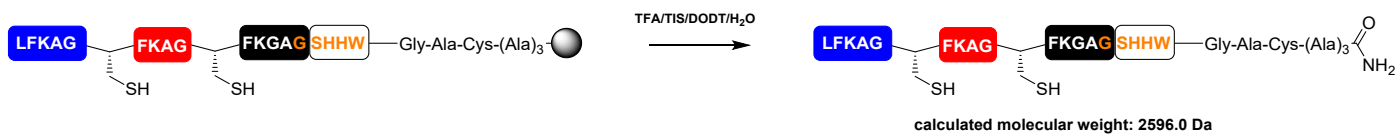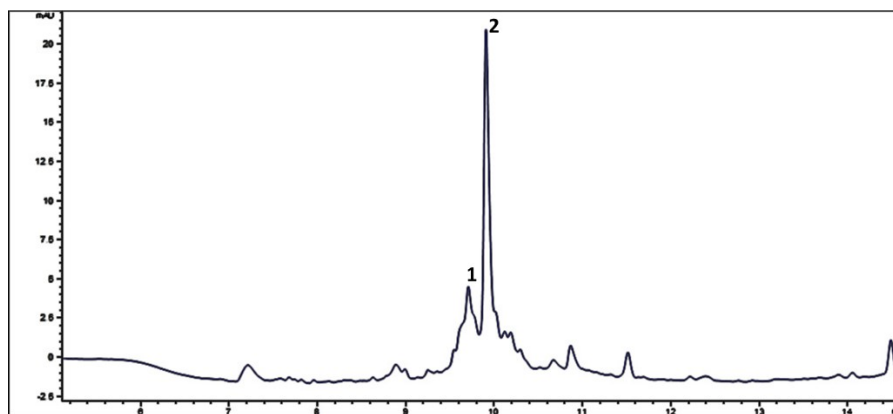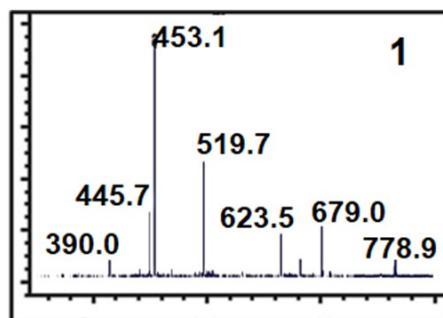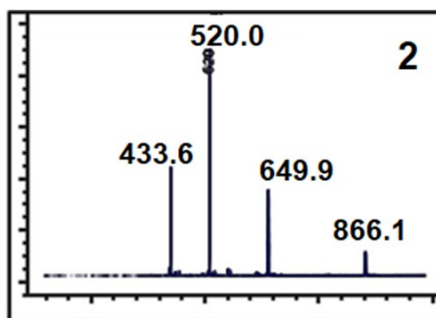

| peak # | found mass   | peak assignment |
|--------|--------------|-----------------|
| 1      | 3112.3 ± 0.3 | ?               |
| 2      | 2595.4 ± 0.2 |                 |

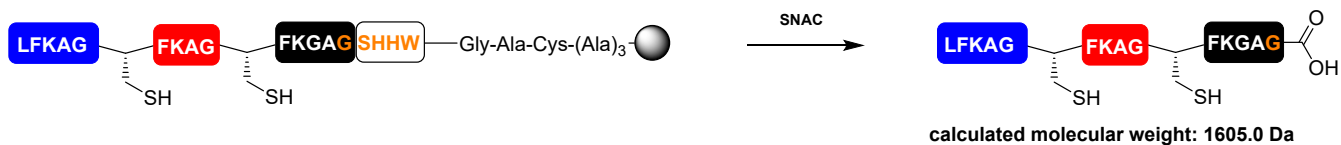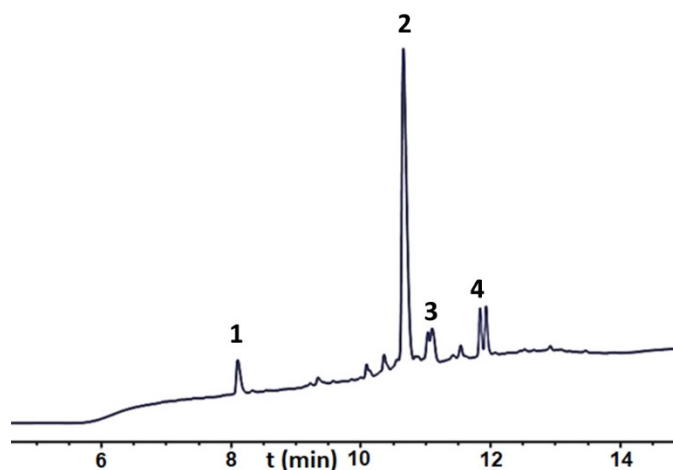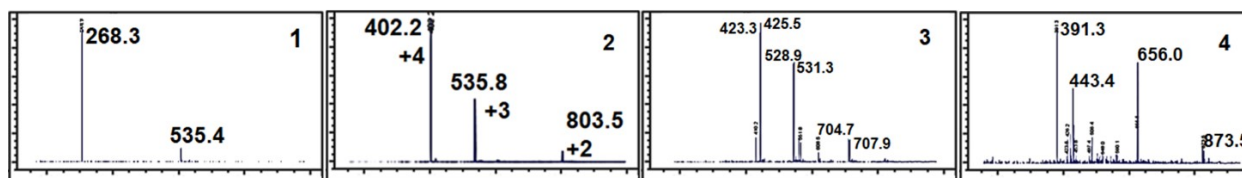

| peak # | found mass                       | peak assignment |
|--------|----------------------------------|-----------------|
| 1      | 534.5 ± 0.1                      | ?               |
| 2      | 1604.7 ± 0.2                     |                 |
| 3      | 2111.4 ± 0.2 and<br>2121.8 ± 0.8 | ?               |
| 4      | ?                                | ?               |

### 3. LC/MS chromatograms for the synthesis of compounds 5

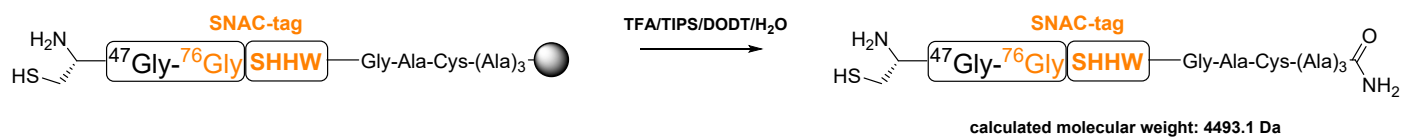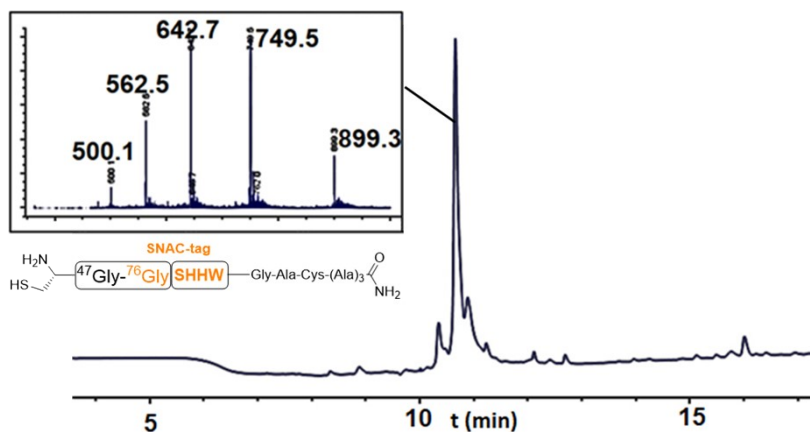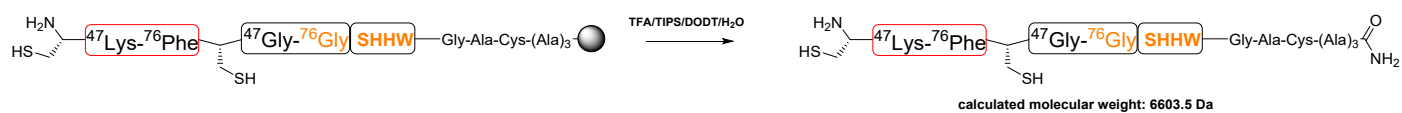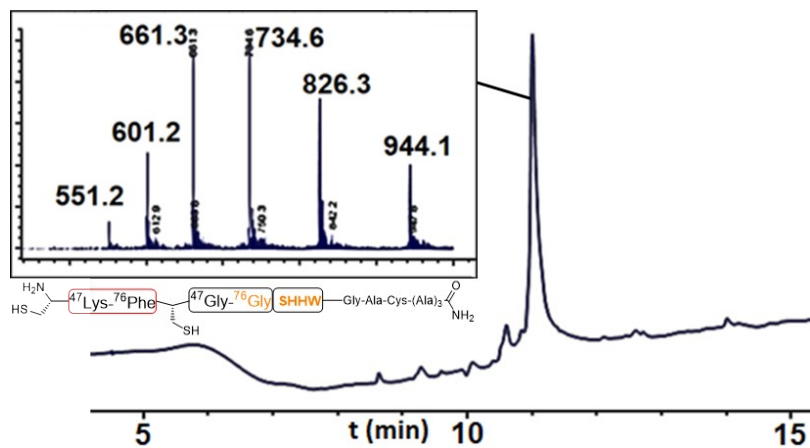

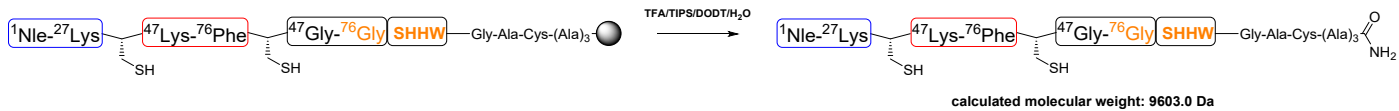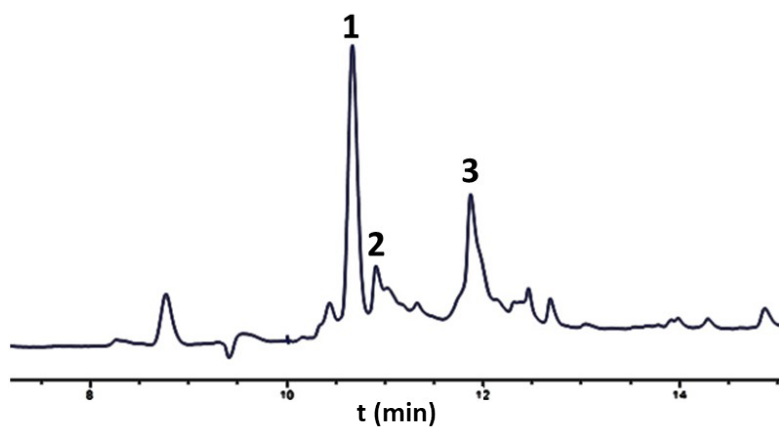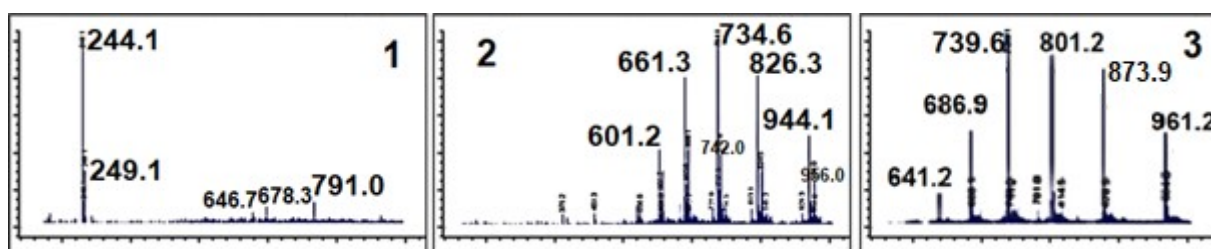

| peak # | found mass   | peak assignment                                                                                                                                          |
|--------|--------------|----------------------------------------------------------------------------------------------------------------------------------------------------------|
| 1      | ?            | ?                                                                                                                                                        |
| 2      | 6602.3 ± 0.4 | $\text{H}_2\text{N} - ^{47}\text{Lys-}^{76}\text{Phe-SH} - ^{47}\text{Gly-}^{76}\text{Gly-SHHW} - \text{Gly-Ala-Cys-(Ala)}_3\text{-NH}_2$                |
| 3      | 9602.3 ± 0.4 | $^{1}\text{Nle-}^{27}\text{Lys-SH} - ^{47}\text{Lys-}^{76}\text{Phe-SH} - ^{47}\text{Gly-}^{76}\text{Gly-SHHW} - \text{Gly-Ala-Cys-(Ala)}_3\text{-NH}_2$ |

## 4. Supplementary figures

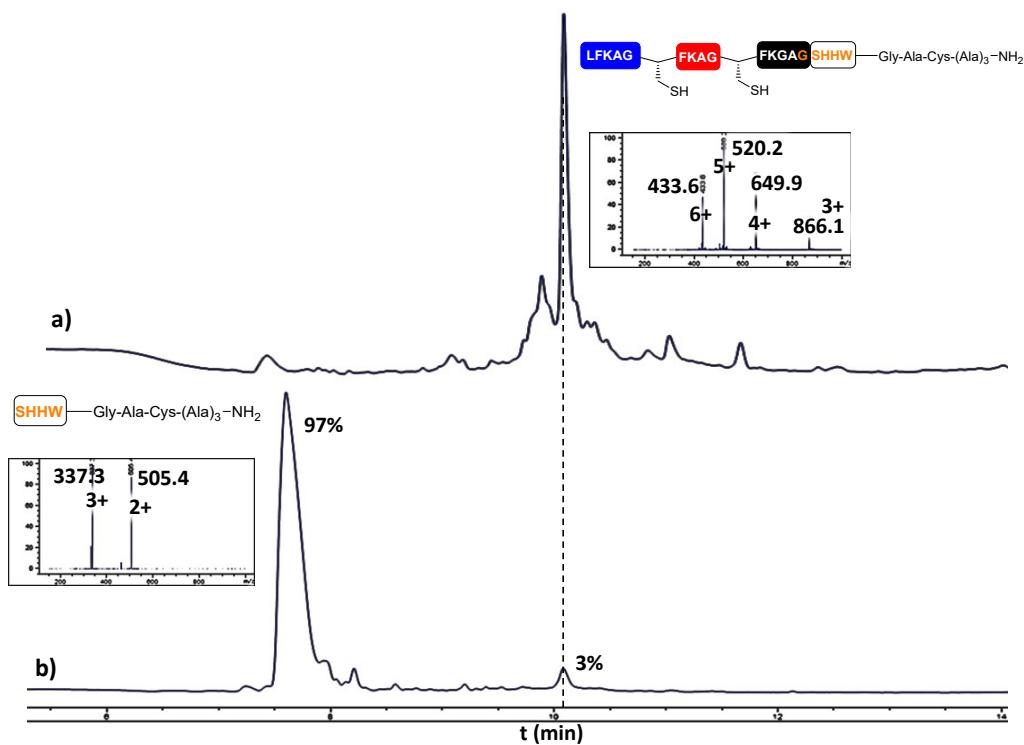

**Supplementary figure 1.** LC chromatogram recorded at 280 nm of TFA cleavages of polypeptide **4** before (a) and after (b) SNAC. Percentage of cleavage is worked out by integrating the areas of the peak corresponding to the cleaved linker and to the peptide remained on the resin. Column: ACE 3 C18, 2.1 x 100 mm, 3  $\mu$ m particle size, 300  $\text{\AA}$  pore size; Method: flow rate = 0.5 mL  $\cdot$  min<sup>-1</sup>, H<sub>2</sub>O: CH<sub>3</sub>CN, 0.1% HCOOH, 95:5 for 2 min  $\rightarrow$  95:5 to 43:57 over 13 min  $\rightarrow$  5:95 for 7 min.

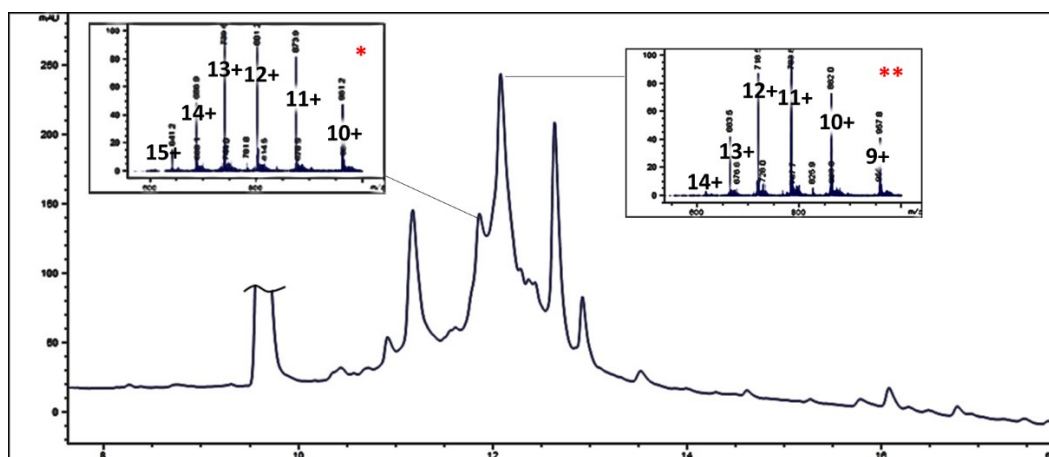

**Supplementary figure 2.** LC chromatogram recorded at 214 nm of TFA cleavages after SNAC for the synthesis of compound **5**. \* denotes uncleaved intermediate **5c**\*, \*\* denotes cleaved product **5**.



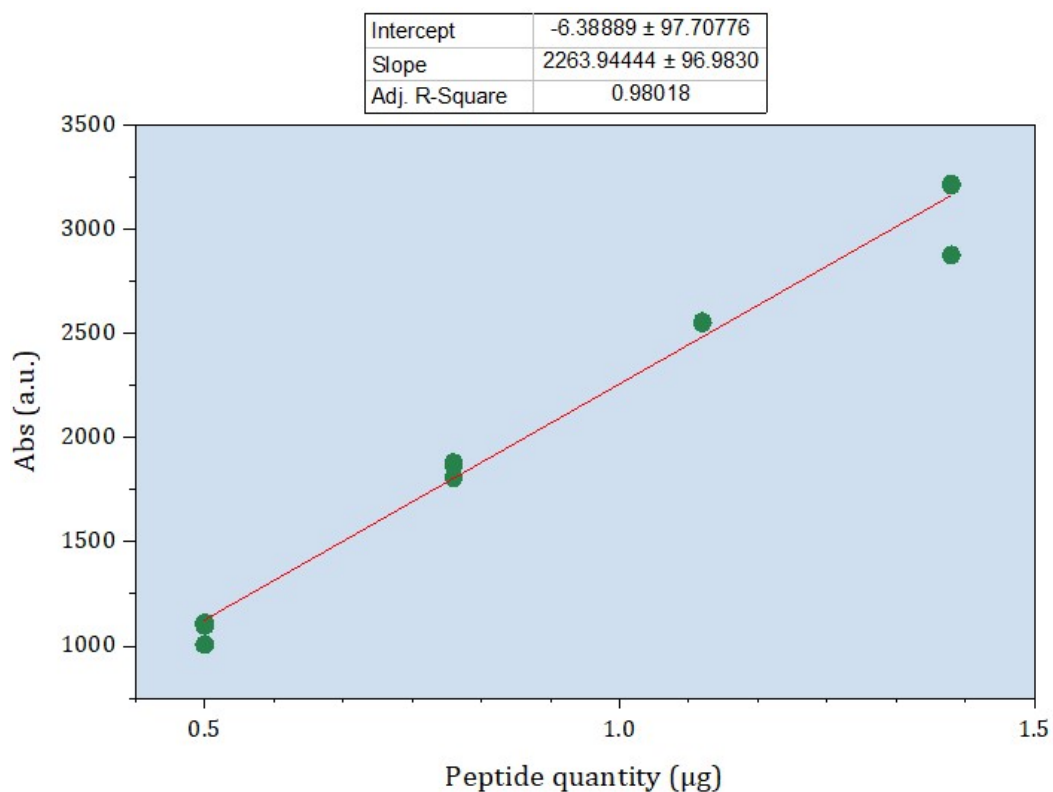

**Supplementary figure 3.** Calibration curve for polypeptide H-LFKAGCFKAGCFKGAG-NH<sub>2</sub>. The plot was obtained by plotting the absorbance obtained at the LC/MS of a stock solution of H-LFKAGCFKAGCFKGAG-NH<sub>2</sub>. For each quantity point, LC/MS run was repeated three times. The calibration curve was obtained by fitting the data points using Origin, version 2019b, OriginLab Corporation, Northampton, MA, USA.

## 5. References

1. J.-S. Zheng, S. Tang, Y.-K. Qi, Z.-P. Wang and L. Liu, *Nat. Protoc.*, 2013, **8**, 2483-2495.
2. D. T. Flood, J. C. J. Hintzen, M. J. Bird, P. A. Cistrone, J. S. Chen and P. E. Dawson, *Angew. Chem. Int. Ed.*, 2018, **57**, 11634-11639.
